# Supplementary material
Source: PubMed Central journal article supplement (PMC3735780)
Supplement: NIHMS483068-supplement-01.pdf [file NIHMS483068-supplement-01.pdf]

**A1**

|     |                                              |                                     |                                               |     |
|-----|----------------------------------------------|-------------------------------------|-----------------------------------------------|-----|
| 5'- | Antisense sequence<br>(1-21 mature mi/siRNA) | miR-155 loop<br>GTTTTGGCCACTGACTGAC | Sense sequence<br>(Nucleotides 1-8 and 11-21) | -3' |
|-----|----------------------------------------------|-------------------------------------|-----------------------------------------------|-----|

**A2**

## ADAM17 coding sequence matching miA17-94

|       |             |                                |
|-------|-------------|--------------------------------|
| rat   | (NM_020306) | CTTGAGAAGCTTGATTCTTTG          |
| mouse | (NM_009615) | CTTGAGAAGCTTGATTCTTTG          |
| human | (NM_003183) | CT <u>C</u> GAGAAGCTTGATTCTTTG |

## ADAM17 coding sequence matching miA17-450

|       |             |                                |
|-------|-------------|--------------------------------|
| rat   | (NM_020306) | GCCACTTTGGAGGTTTGTAA           |
| mouse | (NM_009615) | GCCACTTTGGAGGTTTGT <u>C</u> AA |
| human | (NM_003183) | GCCACTTTGGAGATTTGT <u>T</u> AA |

## ADAM17 coding sequence matching miA17-724

|       |             |                                                  |
|-------|-------------|--------------------------------------------------|
| rat   | (NM_020306) | GGAGAAGAGAGCACTACTACA                            |
| mouse | (NM_009615) | GGAGAAGAGAGCACC <u>C</u> ACTACA                  |
| human | (NM_003183) | GG <u>G</u> GAAGAGAG <u>T</u> AC <u>A</u> ACTACA |

**A3**

## Closest rat homologies to miA17-94

|              |                |                                         |
|--------------|----------------|-----------------------------------------|
| ADAM17       | (NM_020306)    | CTTGAGAAGCTTGATTCTTTG                   |
| S1pr3 3'UTR  | (NM_001271143) | <u>GT</u> AGAGAAGCTTGATT <u>CGTGT</u>   |
| TL0ADA33YG04 | (FQ221658)     | CTTGAGAAGCTTGAG <u>GCATGCT</u>          |
| Gcfc2        | (NM_001134554) | <u>A</u> TTGAGAAGCTTGAG <u>GAGTGG</u> A |
| ADAM15       | (NM_020308)    | <u>TG</u> AGAGAAGCT <u>ATACACTGGA</u>   |

## Closest rat homologies to miA17-450

|              |             |                                               |
|--------------|-------------|-----------------------------------------------|
| ADAM17       | (NM_020306) | GCCACTTTGGAGGTTTGTAA                          |
| TL0ACA47YG15 | (FQ215635)  | <u>CCAGGT</u> A <u>T</u> GGAGGTTTGT <u>CT</u> |
| Dnmt1 3'UTR  | (NM_053354) | <u>AAGCTG</u> TTGGAGGTTTGT <u>CT</u>          |
| ADAM4        | (NM_020305) | <u>CCTGC</u> ACTGGAGG <u>CTGAAAG</u>          |

## Closest rat homologies to miA17-724

|             |                |                                        |
|-------------|----------------|----------------------------------------|
| ADAM17      | (NM_020306)    | GGAGAAGAGAGCACTACTACA                  |
| Usp29 3'UTR | (NM_001108465) | <u>TC</u> AGAAGAGAGCACTAG <u>GATCT</u> |
| ADAM4       | (NM_020305)    | G <u>CTTTT</u> CAGAGCACTA <u>ATGCT</u> |

**Supplemental Fig A. 1.** Adenovirally encoded synthetic Pre-miRNA oligo structure. The ninth and tenth nucleotides of the sense target sequence are removed to create an internal loop. **2.** ADAM17 sequence homologies to rat ADAM17 mi/siRNAs. **3.** Blast results of closest rat homologies to rat ADAM17 mi/siRNAs.

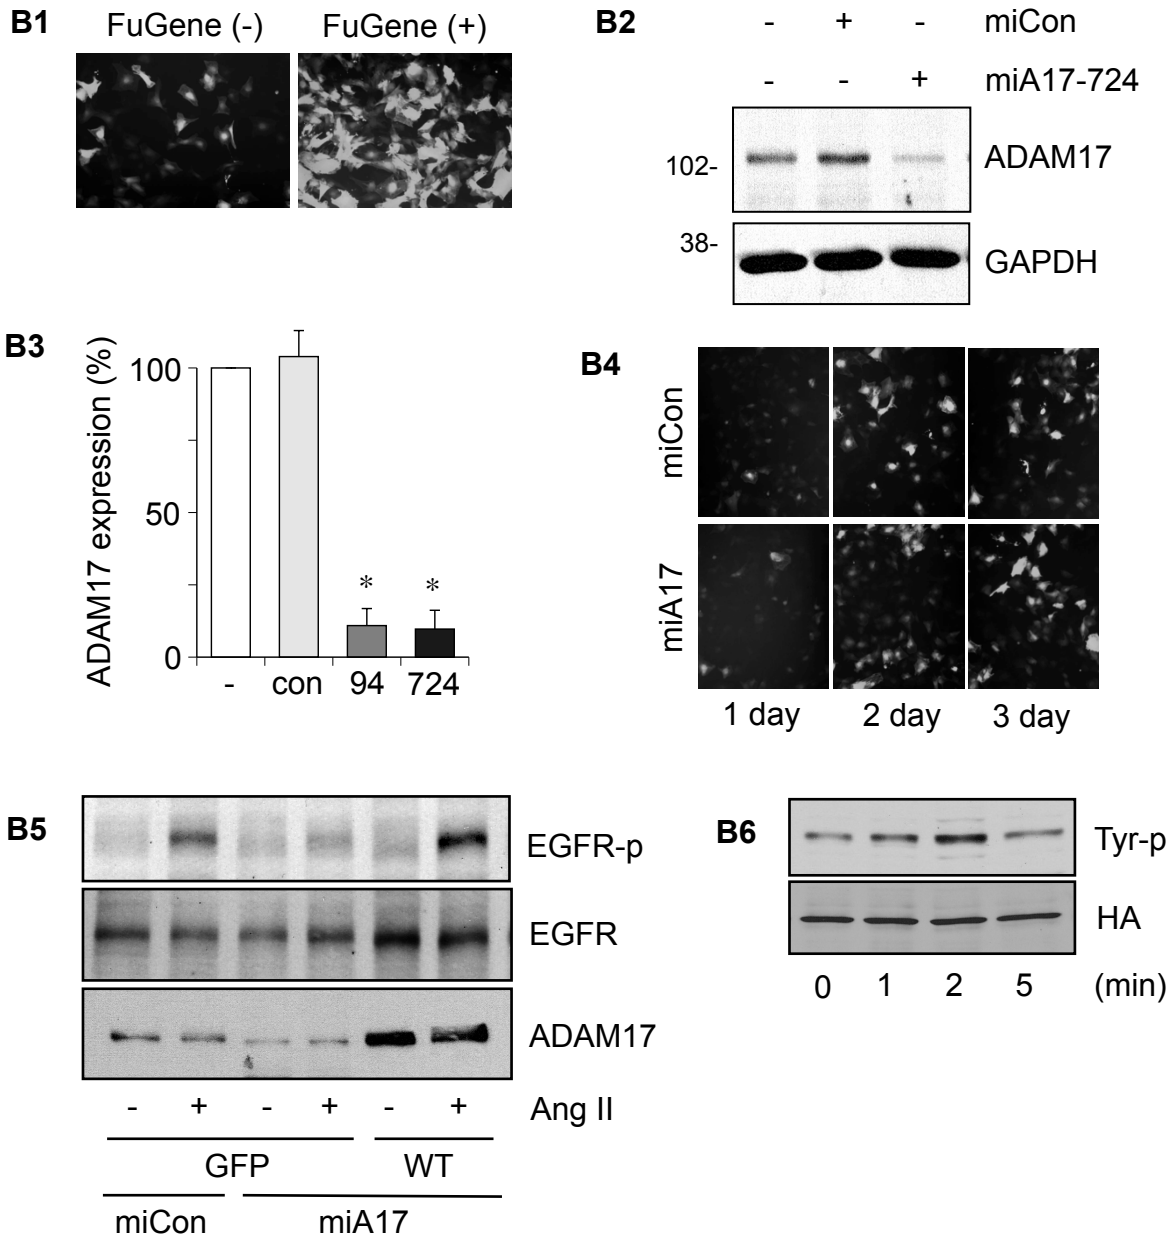

**Supplementary Figure B: 1.** Enhancement of adenovirus infection by FuGene 6. VSMC were infected with adenovirus encoding GFP and miA17-450 at 50 MOI for 3 days in the presence or absence of 3% FuGene 6. GFP expression was analyzed by fluorescent microscopy. Representative results are shown from triplicated experiments. **2.** VSMC were infected with adenovirus expressing miCon or miA17-724 at 100 MOI for 3 days. Cell lysates were analyzed by immunoblotting with antibodies as indicated. Representative blots are shown from triplicated experiments. **3.** Densitometry analysis of the data from triplicated experiments (mean  $\pm$  SD, \*  $p < 0.05$  compared with miRNA control). **4.** VSMC were infected with 50 MOI adenovirus for the indicated time. GFP expression was analyzed by fluorescent microscopy. Representative results are shown from triplicated experiments. **5.** Rat VSMC were infected with adenovirus encoding miA17-450 or miCon (100 MOI) together with wild type mouse ADAM17 or control GFP (10 MOI) for 3 days and immunoblotting was performed with or without 100 nM Ang II stimulation. **6.** VSMC infected with adenovirus encoding HA-tagged wild-type ADAM17 were stimulated with 100 nM Ang II for indicated time. Cell lysates were immunoprecipitated with anti-HA antibody and immunoblotted with antibodies as indicated. Representative blots are shown from triplicated experiments.
